# Supplementary material for: Recent Advances in the Use of Molecular Methods for the Diagnosis of Bacterial Infections
Source: MDPI journal article supplement (doi:10.3390/pathogens11060663), 2022-06-08
Supplement: s1 [file s1]

Table S1. Summary of available technologies.

| <b>Methods</b>                                | <b>References</b> |
|-----------------------------------------------|-------------------|
| <i>PCR</i>                                    | [92,93]           |
| <i>Real-Time PCR</i>                          | [36,94]           |
| <i>LAMP</i>                                   | [95,96]           |
| <i>NASBA</i>                                  | [97,98]           |
| <i>TMA</i>                                    | [98,99]           |
| <i>HDA</i>                                    | [49,100]          |
| <i>The BioFire FilmArray panels</i>           | [101,102]         |
| <i>DNA microarrays</i>                        | [60,61]           |
| <i>Pulse-Field Gel Electrophoresis (PFGE)</i> | [68,103]          |
| <i>Multilocus Sequencing Typing (MLST)</i>    | [104,105]         |
| <i>Whole Genome Sequencing (WGS)</i>          | [71,106]          |
| <i>Pyrosequencing</i>                         | [70,107]          |
| <i>Next-Generation Sequencing (NGS)</i>       | [73,108]          |
| <i>Microfluidics</i>                          | [75,76]           |
| <i>Immunodetection of Pathogens</i>           | [28,109]          |
| <i>Detection of Growth-Related Molecules</i>  | [28,77,78]        |
| <i>Biosensor Systems</i>                      | [80–82]           |
